# Supplementary material for: Seasonal dynamics of the nutritive value of temperate forage trees differ among species
Source: Research Square preprint supplement (doi:10.21203/rs.3.rs-6278391/v1), 2025-04-22
Supplement: Supplementary file 1 [file b3ee79b18e2e75ee55d2adda.xlsx]

## Sheet: SM1_SamplingLocation_TreeNutVa
	Seasonal dynamics of the nutritive value of temperate forage trees differ among species
	Agroforestry systems
	Geoffrey Mesbahi*, Philippe Barre, Rémy Delagarde, Cécile Ginane, Sandra Novak
	* corresponding author: INRAE, FERLUS, 86600, Lusignan, France - Research Institute of Organic Agriculture (FiBL), Department of livestock sciences, 5070, Frick, Switzerland - geoffrey.mesbahi@gmail.com
	SM 1: Distribution of the samples among sites each year
	Species	2015			2016			2017			2015 Total	2016 Total	2017 Total	Grand Total
		June	August	October	June	August	October	June	August	October
	Acer pseudoplatanus				12	12	12					36		36
	Alnus cordata		1		3	3	3		6		1	9	6	16
	Castanea sativa		2		3	3	3		3		2	9	3	14
	Corylus avellana		2		3	3	3		3		2	9	3	14
	Fagus sylvatica				2	2	2					6		6
	Fraxinus americana				2	2	2					6		6
	Fraxinus excelsior	1	3	1	17	17	17		3		5	51	3	59
	Gleditsia triacanthos				2	2	2					6		6
	Juglans x intermedia				4	4	4					12		12
	Morus alba		2		6	8	6	4	3		2	20	7	29
	Paulownia tomentosa							3	6	3			12	12
	Prunus avium				6	6	6					18		18
	Robinia pseudoacacia		2		3	3	3		3		2	9	3	14
	Sorbus domestica				4	4	4					12		12
	Ulmus minor				3	6	3		3			12	3	15
	Ulmus ‘Nanguen’		1		3	6	3		3		1	12	3	16
	Grand Total	1	13	1	73	81	73	7	33	3	15	227	43	285
