# Supplementary material for: Seasonal dynamics of the nutritive value of temperate forage trees differ among species
Source: Research Square preprint supplement (doi:10.21203/rs.3.rs-6278391/v1), 2025-04-22
Supplement: Supplementary file 2 [file f6b61b2dc6db8b6468be178c.xlsx]

## Sheet: SM3
	Seasonal dynamics of the nutritive value of temperate forage trees differ among species
	Agroforestry systems
	Geoffrey Mesbahi*, Philippe Barre, Rémy Delagarde, Cécile Ginane, Sandra Novak
	* corresponding author: INRAE, FERLUS, 86600, Lusignan, France - Research Institute of Organic Agriculture (FiBL), Department of livestock sciences, 5070, Frick, Switzerland - geoffrey.mesbahi@gmail.com
	SM 2: Combined effects of season and species on nutritive values of forage trees
	species	season	CP		IVDMD		Ash		NDF		ADF		ADL		DM
			emmean	grp	emmean	grp	emmean	grp	emmean	grp	emmean	grp	emmean	grp	emmean	grp
	Acer pseudoplatanus	June	147.366	fghijklm	69.6197	def	64.1541	ij n pqrst	374.548	fghijklmn	225.104	fghijklm	81.1289	bcdefg	301.914	defghijklmn
		August	127.2	lmnopq	66.6613	defghijk	84.2374	defgh klm o	365.381	defghi k	204.937	defgh	81.2122	bcdefg	415.747	qrstuv
		October	105.366	o qr	62.753	ghijklm	99.4874	cd	363.964	defghi k	217.937	efghi k	90.2122	fgh k	449.164	tuvw
	Alnus cordata	June	183.575	bcdefghij	69.6403	defghijk	42.1513	qrstu	448.555	jklm opqrs	338.059	r	233.245	u	304.064	abcdefghijklmn
		August	173.723	defgh j	60.2236	ghijklmno	60.3179	n pqrst	447.088	opqrs	316.709	qr	205.212	tu	366.205	l nopqrs
		October	162.575	defghijklmn	62.5736	defghijklmno	57.1513	ijklmnopqrstu	413.889	fghijklmnopqrs	301.725	nopqr	200.911	stu	379.731	h klmnopqrstuv
	Castanea sativa	June	153.575	defghijklmnop	64.8736	defghijklm	30.1513	u	402.555	fghijklmnopqr	242.392	fghijklmnop	72.5779	abcdefg	253.064	abcde
		August	172.814	defgh j	62.1803	fghijklmn	42.6929	r tu	433.392	j l opqrs	247.487	hijklmnop	86.0319	bcdefgh	334.456	efghijklmnop
		October	185.908	bcdefgh	52.007	mnop	43.8179	qrstu	509.889	s	279.392	klmnopqr	94.5779	bcdefghijklmn	297.398	abcdefghijklmn
	Corylus avellana	June	206.575	abcde	56.7736	ijklmnop	55.8179	mnopqrstu	421.889	ghijklmnopqrs	232.392	efghijklmnop	99.5779	defghijklmn	256.064	abcdef i
		August	138.064	ghijklmnopq	48.5428	p	66.3179	ijklmnopq s	463.767	qrs	246.862	hijklmnop	127.157	ij lmnopqr	411.456	qrstuv
		October	188.908	bcdefg	46.3736	p	70.4846	defghijklmnopqrst	498.555	rs	261.725	hijklmnopqr	135.911	klmnopqr	328.731	b defghijklmnopqr
	Fagus sylvatica	June	128.719	fghijklmnopqr	47.5618	op	32.1411	stu	468.001	lmnopqrs	260.01	fghijklmnopqr	131.208	ghijklmnopqr	384.871	fghijklmnopqrstuv
		August	130.719	fghijklmnopqr	46.2118	p	47.6411	pqrstu	438.001	hijklmnopqrs	225.01	bcdefghijklmnop	89.7078	abcdefghijklmn	536.371	wx
		October	115.719	fghijklmnopqr	48.3118	nop	56.6411	fghijklmnopqrstu	446.501	ijklmnopqrs	235.01	defghijklmnopq	97.7078	abcdefghijklmnopq	540.371	wx
	Fraxinus americana	June	158.481	cdefghijklmnopq	70.6213	bcdefghijkl	75.4342	defghijklmnopqrst	348.675	abcdefghijklmnop	250.288	efghijklmnopqr	96.5041	abcdefghijklmnop	245.619	abcdefgh
		August	142.981	efghijklmnopqr	71.8213	bcdefghij	88.9342	bcdefghijklmnop	316.675	abcdefghi	238.288	defghijklmnopq	99.0041	abcdefghijklmnop	333.619	cdefghijklmnopqrs
		October	90.4813	mnopqr	67.1213	defghijklm	62.9342	efghijklmnopqrstu	340.175	abcdefghijklmno	258.788	fghijklmnopqr	100.504	abcdefghijklmnopqr	390.119	ijklmnopqrstuv
	Fraxinus excelsior	June	160.225	efgh jk	72.0294	de	69.115	ghijklmnopq	371.733	efghi k mn	256.26	j lmnop	120.029	ij lmnopq	293.038	b defghijk
		August	135.645	i lmn p	72.9283	d	90.5287	def	338.637	cdef	218.365	fghi k	85.0887	c efg	402.789	qrst
		October	114.613	nopqr	72.0905	de	93.3928	de	304.844	abc	195.371	cdefg	63.751	abcde	405.927	qrstu
	Gleditsia triacanthos	June	215.981	abcde	64.7713	defghijklmno	68.9342	defghijklmnopqrstu	362.175	abcdefghijklmnopq	266.788	ghijklmnopqr	146.504	j mnopqrs	261.619	abcdefghijkl
		August	124.481	fghijklmnopqr	55.9213	hijklmnop	74.9342	defghijklmnopqrst	385.675	cdefghijklmnopqrs	277.288	hijklmnopqr	156.504	nopqrst	439.619	opqrstuvw
		October	89.9813	mnopqr	54.3213	klmnop	80.4342	cdefghijklmnopqr	393.175	cdefghijklmnopqrs	302.288	mnopqr	167.004	qrstu	405.619	nopqrstuvw
	Juglans x intermedia	June	213.685	abcd	74.7503	bcde	57.0621	hi l opqrstu	308.285	abcdef	233.145	efghijklmnop	92.8759	abcdefghijklm	208.18	ab
		August	150.935	efghijklmnop	68.9253	defghijkl	92.5621	bcdefg jk mn	321.285	abcdefgh	232.395	efghijklmnop	104.126	defghijklmnop	360.18	efghijklmnopqrst
		October	120.435	hijklmnopqr	72.0003	bcdefg	109.562	abcd	290.035	abcde	217.645	bcdefghijklmno	98.6259	bcdefghijklmno	388.43	mnopqrstuv
	Morus alba	June	249.643	a	88.3657	a	93.1638	cdefgh	264.183	a	140.853	a	39.3255	a	217.428	a c
		August	176.548	def	83.2837	ab	132.593	a	296.871	abc	143.008	a	48.0742	a	337.262	efghijklmno
		October	168.31	defghijkl	82.4866	abc	140.997	a	265.067	ab	144.877	abc	51.3255	abcdef	318.471	b defghijklmno
	Paulownia tomentosa	June	140.865	defghijklmnopqr	57.972	defghijklmnop	65.452	defghijklmnopqrstu	493.427	pqrs	330.238	opqr	177.322	pqrstu	316.787	abcdefghijklmnopqrst
		August	114.222	klmnopqr	55.1865	lmnop	71.4683	defghijklmnopqrst	473.6	qrs	325.236	qr	166.453	rst	311.574	b defghijklmnop
		October	116.199	fghijklmnopqr	58.1387	defghijklmnop	66.452	defghijklmnopqrstu	452.093	hijklmnopqrs	305.571	ijklmnopqr	156.988	klmnopqrst	352.12	abcdefghijklmnopqrstuv
	Prunus avium	June	147.768	fghijklmn p	69.4073	defgh j	84.0208	defghijklmnop	386.323	fghijklmnopq	238.17	fghijklmnop	134.241	mnopqr	308.62	defghijklmn
		August	113.268	mnopqr	69.6573	defgh	99.0208	bcde	357.156	cdefghijk	182.67	abcdef	82.241	abcdefgh	438.953	stuvw
		October	94.6014	qr	73.5073	cde	96.6874	cde	300.823	abcd	150.836	abc	64.0743	abcdef	472.453	uvw
	Robinia pseudoacacia	June	243.575	ab	63.6403	defghijklmn	57.1513	ijklmnopqrstu	348.555	abcdefghijklmn	195.725	abcdefghij	80.9113	abcdefghij	228.398	abcd
		August	223.814	abc	47.8428	p	59.6929	n pqrstu	486.392	rs	295.487	pqr	146.782	opqr	347.956	fghijklmnopq
		October	176.241	cdefghijkl	45.6403	p	57.1513	ijklmnopqrstu	489.222	rs	305.725	pqr	131.578	hijklmnopqr	269.731	abcdefghijk m
	Sorbus domestica	June	117.219	klmnopqr	63.2718	defghijklmn	62.0071	ghijklmnopqrstu	341.495	abcdefghi	235.94	fghijklmnop	99.0694	defghijklmn	351.75	efghijklmnopqrs
		August	96.969	opqr	66.1968	defghijkl	76.5071	defghijklmnopq	318.495	abcdefg	207.94	abcdefghijkl	86.5694	abcdefghi kl	489.5	vwx
		October	79.719	r	62.9718	efghijklmn	76.5071	defghijklmnopq	330.245	abcdefghi	220.44	defghijklmn	96.5694	bcdefghijklm	576	x
	Ulmus minor	June	128.241	fghijklmnopqr	64.2403	defghijklmn	92.8179	cdefghijkl	450.889	jklm opqrs	126.725	a	42.9113	abc	261.064	abcdefg ij
		August	115.708	mnopqr	60.7001	fghijklmno	127.35	ab	387.337	fghijklmnop	152.998	abcd	52.7977	ab d	424.418	rstuvw
		October	121.908	ijklmnopqr	57.2736	hijklmnop	143.818	a	408.555	fghijklmnopqrs	142.059	abcd	48.9113	abcdef	387.398	l nopqrstuv
	Ulmus ‘Nanguen’	June	182.575	bcdefghij	68.007	defghijkl	84.1513	defghijklmnop	399.222	efghijklmnopqr	136.059	abc	51.5779	abcdef	276.731	abcdefghijklmn
		August	128.721	klmnopqr	61.6854	fghijklmn	118.118	abc	362.623	defghi n	152.656	ab	55.3104	ab d	396.516	pqrstu
		October	123.575	hijklmnopqr	56.1403	i klmnop	123.485	abc	357.555	bcdefghijklmn	153.725	abcde	62.2446	abcdef	372.064	gh jklmnopqrstu
